# Supplementary material for: ERSEM 15.06: a generic model for marine biogeochemistry and the ecosystem dynamics of the lower trophic levels
Source: Copernicus journal article supplement (doi:10.5194/gmd-9-1293-2016), 2016-04-05
Supplement: Supplementary file 1 [file gmd-9-1293-2016-supplement.zip]

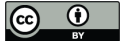

## *Supplement of*

# **ERSEM 15.06: a generic model for marine biogeochemistry and the ecosystem dynamics of the lower trophic levels**

**M. Butenschön et al.**

*Correspondence to:* Momme Butenschön (momm@pml.ac.uk)

- gmd-9-1293-2016-supplement-title-page.pdf
- ERSEM-1506-GMDD-supplements.pdf
- implementations
  - BATS
    - \* BioParams
    - \* ErsemRestart.nc
    - \* airsea.nml
    - \* bio.nml
    - \* gotmersem
    - \* gotmersem.nml
    - \* gotmmean.nml
    - \* gotmrun.nml
    - \* gotmturb.nml
    - \* include
    - \* meteo\_BATS.1988-2013.dat
    - \* obs.nml
    - \* seagrass.nml
    - \* sprof\_BATS.1988-2007.dat
    - \* tprof\_BATS.1988-2007.dat
  - BioParams
    - \* BioParams.xml
    - \* bacteria.nml
    - \* benthicOldenburg.nml
    - \* benthos.nml
    - \* calc.nml
    - \* d3morf.nml

- \* fmatrix.nml
- \* heterotrophic\_nanoflagellate.nml
- \* iop.nml
- \* mesozoo.nml
- \* microzooplankton.nml
- \* ox.nml
- \* pel.nml
- \* primary\_producers.nml
- \* sedimentation.nml
- GotmErsem
  - \* compileGotmErsem.sh
  - \* ncdfErsem0D.list
  - \* ncdfErsem2D.list
  - \* ncdfErsem3D.list
- L4
  - \* BioParams
  - \* airsea.nml
  - \* bio.nml
  - \* gotmersem
  - \* gotmersem.nml
  - \* gotmmean.nml
  - \* gotmrun.nml
  - \* gotmturb.nml
  - \* include
  - \* meteo.2000-2013.dat
  - \* meteo.dat
  - \* obs.nml
  - \* pressure\_2002\_2010.dat
  - \* sal\_prof\_2002\_2013
  - \* seagrass.nml
  - \* temp\_prof\_2002\_2013
- OysterGrounds
  - \* BioParams
  - \* airsea.nml
  - \* ecmwf\_oystergrounds\_1958\_2008.dat
  - \* ext\_press\_file.dat
  - \* gotmersem
  - \* gotmersem.nml
  - \* gotmmean.nml
  - \* gotmrun.nml
  - \* gotmturb.nml
  - \* include
  - \* obs.nml
  - \* seagrass.nml
- aquarium
  - \* compile.sh

- \* include
- \* ncdfersem0D.list
- \* ncdfersem2D.list
- \* ncdfersem3D.list

The copyright of individual parts of the supplement might differ from the CC-BY 3.0 licence.
