# Supplementary material for: ERSEM 15.06: a generic model for marine biogeochemistry and the ecosystem dynamics of the lower trophic levels
Source: Copernicus journal article supplement (doi:10.5194/gmd-9-1293-2016), 2016-04-05
Supplement: Supplementary file 2 [file gmd-9-1293-2016-supplement.zip]

# 1 Parametrisation

The tables below specify the parametrisation used for all simulations described in the “Implementations” section of the paper and in the test harness example. Each parameter appears under the namelist file and namelist identifier that contain it, stating its name in the code, the mathematical symbol used for it in the paper, a description, its unit and its value.

## 1.1 bacteria.nml: bacteriaParameters

| Code ID                | Symbol                           | Description                                                                              | Unit                            | Value   |
|------------------------|----------------------------------|------------------------------------------------------------------------------------------|---------------------------------|---------|
| chB1nX                 | $h_{\text{N}}^B$                 | Michaelis-Menten constant for nitrogen limitation of bacteria                            | $\text{mmol} * \text{m}^{-3}$   | 0.5     |
| chB1pX                 | $h_{\text{P}}^B$                 | Michaelis-Menten constant for phosphorus limitation of bacteria                          | $\text{mmol} * \text{m}^{-3}$   | 0.1     |
| chdB1oX                | $h_{\text{O}}^B$                 | Michaelis-Menten constant for oxygen limitation of bacteria relative to saturation state | 1                               | 0.31    |
| chN3oX                 | $h_{\text{O}}^{\text{nitr}}$     | Cubic Michaelis-Menten constant for oxygenic control of nitrification                    | $\text{mmol}^3 * \text{m}^{-9}$ | 2700.   |
| chN4nX                 | $h_{\text{N}}^{\text{nitr}}$     | Cubic Michaelis-Menten constant for ammonium limitation of nitrification                 | $\text{mmol}^3 * \text{m}^{-9}$ | .5      |
| frB1R3                 | $q_{\text{srefr}}$               | Bacteria uptake converted to semi-refractory DOC in proportion to activity respiration   | 1                               | 0.3     |
| fsinkX                 | $r_{\text{scav}}^{\text{Fe}}$    | Specific scavenging rate for iron                                                        | $\text{d}^{-1}$                 | 0.00007 |
| puB1oX                 | $h_{\text{lowO}}^B$              | Bacterial efficiency at low oxygen levels                                                | 1                               | 0.2     |
| puB1X                  | $h_{\text{highO}}^B$             | Bacterial efficiency at high oxygen levels                                               | 1                               | 0.6     |
| puR4_B1X               | $r_{\text{small}}^{\text{slab}}$ | Turn-over of small POM relative to DOM                                                   | $\text{d}^{-1}$                 | 1.E-2   |
| Continued on next page |                                  |                                                                                          |                                 |         |

Table 1 – continued from previous page

| Code ID   | Symbol                  | Description                                                         | Unit           | Value   |
|-----------|-------------------------|---------------------------------------------------------------------|----------------|---------|
| puR6_B1X  | $r_{med}^{slab}$        | Turn-over of medium size POM relative to DOM                        | $d^{-1}$       | 1.E-2   |
| puR8_B1X  | $r_{large}^{slab}$      | Turn-over of large POM relative to DOM                              | $d^{-1}$       | 1.E-2   |
| q10B1X    | $p_{Q10}^B$             | Regulating temperature factor Q10 for bacterial metabolic processes | 1              | 2.      |
| qnB1cX    | $q_{max_{N:C}}^B$       | Maximum N to C quota of bacteria                                    | $mol * g^{-1}$ | 1.67E-2 |
| qpB1cX    | $q_{max_{P:C}}^B$       | Maximum P to C quota Phosphate/Carbon of bacteria                   | $mol * g^{-1}$ | 1.9E-3  |
| redfieldX | $q_{ref_{C:N}}$         | C to N ratio (Redfield)                                             | 1              | 6.63    |
| rR2B1X    | $q_{slab_{M}}^{slab}$   | Turn-over of semi-labile OM relative to DOM                         | 1              | 7.5E-3  |
| rR2R1X    | $r_{decomp}^{slab}$     | Specific rate for breakdown of semi-labile to labile DOC            | $d^{-1}$       | 1.E-2   |
| rR3B1X    | $q_{srefr_{M}}^{srefr}$ | Turn-over of semi-refractory OM relative to DOM                     | 1              | 2.5E-3  |
| sdB1X     | $r_{mort}^B$            | Specific mortality of bacteria at reference temperature             | $d^{-1}$       | 5.E-2   |
| sN4N3X    | $r_{nitr}^B$            | Maximum specific nitrification rate at reference temperature        | $d^{-1}$       | .5      |
| sR1N1X    | $r_{rem_P}$             | Specific remineralisation of DOM to phosphate                       | $d^{-1}$       | 0.E0    |
| sR1N4X    | $r_{rem_N}$             | Specific remineralisation of DOM to ammonium                        | $d^{-1}$       | 0.E0    |
| sR4R1     | $q_{small_{M}}^{small}$ | Turn-over of small POM relative to DOM                              | 1              | 1.E-2   |
| sR6R1     | $q_{med_{M}}^{med}$     | Turn-over of medium size POM relative to DOM                        | 1              | 2.5E-3  |
| sR8R1     | $q_{large_{M}}^{large}$ | Turn-over of large POM relative to DOM                              | 1              | 1.E-3   |
| srsB1X    | $r_{mort}^B$            | Specific rest respiration of bacteria at reference temperature      | $d^{-1}$       | 0.1     |
| sumB1X    | $g_{max}^B$             | Max. specific uptake of bacteria at reference temperature           | $d^{-1}$       | 2.2     |

## 1.2 benthicOldenburg.nml: BenthicOldenburgParameters

| Code ID  | Symbol                  | Description                                                                                 | Unit                          | Value    |
|----------|-------------------------|---------------------------------------------------------------------------------------------|-------------------------------|----------|
| EDZ_1X   | $\vartheta_{oxy}$       | Basal diffusivity of inorganics in aerobic layer                                            | $\text{m}^2 * \text{d}^{-1}$  | 5.00E-05 |
| EDZ_2X   | $\vartheta_{denit}$     | Basal diffusivity of inorganics in anaerobic layer                                          | $\text{m}^2 * \text{d}^{-1}$  | 5.00E-05 |
| EDZ_3X   | $\vartheta_{denit}$     | Basal diffusivity of inorganics in anoxic layer                                             | $\text{m}^2 * \text{d}^{-1}$  | 5.00E-05 |
| EDZ_mixX | $\rho_{vmix}$           | Equilibrium diffusive speed between sediment surface water                                  | $\text{m} * \text{d}^{-1}$    | 20.      |
| hM3G4X   | $^{denitr}h_{\text{N}}$ | Michaelis-Menten constant for benthic nitrate limitation of nitrification                   | $\text{mmol} * \text{m}^{-3}$ | 1.       |
| hM4M3X   | $^{bnitr}h_{\text{N}}$  | Inhibition constant for oxidised nitrogen content at which denitrification is halved        | $\text{mmol} * \text{m}^{-3}$ | 10.      |
| M11adsX  | $^{\text{P}}\rho_{ads}$ | Phosphorus adsorption factor in anoxic layer                                                | 1                             | 2.       |
| M1adsX   | $^{\text{P}}\rho_{ads}$ | Phosphorus adsorption factor in oxygenated and oxidised layer                               | 1                             | 100.     |
| M4adsX   | $^{amm}\rho_{ads}$      | Ammonium adsorption factor                                                                  | 1                             | 3.       |
| pammonX  | $^Hq_{red}$             | Maximum fraction of anaerobic bacteria respiration resulting in oxidised nitrogen reduction | 1                             | 0.5      |
| pdenitX  | $^Hq_{denit}$           | Fraction of reduction subject to denitrification as opposed to ammonification               | 1                             | 0.05     |
| q10nitX  | $^{bnitr}\rho_{Q10}$    | Regulating temperature factor Q10 for nitrification                                         | 1                             | 2.       |
| relax_mX | $\tau_{denit}$          | Oxidised nitrogen relaxation time scale                                                     | $\text{d}^{-1}$               | 5.       |
| relax_oX | $\tau_{ox}$             | Oxygen relaxation time scale                                                                | $\text{d}^{-1}$               | 5.       |
| sM4M3X   | $^Hr_{nitr}$            | Specific nitrification rate                                                                 | $\text{d}^{-1}$               | 4.       |
| sQ6M5X   | $r_{\text{Sremin}}$     | Specific silicate regeneration rate                                                         | $\text{d}^{-1}$               | 7.00E-03 |

### 1.3 benthos.nml: benthosParameters

| Code ID | Symbol             | Description                                                                            | Unit                   | Value    |
|---------|--------------------|----------------------------------------------------------------------------------------|------------------------|----------|
| d_totX  | $d_{tot}$          | Total depth of benthic layer system                                                    | m                      | 0.3      |
| ddH1X   | $d_{ref}^{oxy}$    | Aerobic half saturation depth of bacterial uptake regulation                           | $m^{-1}$               | 1.00E-03 |
| ddH2X   | $d_{ref}^{denit}$  | Anerobic half saturation depth of bacterial uptake regulation                          | $m^{-1}$               | 1.00E-02 |
| dQ6Y2X  | $d_Y^{DEPO}$       | Lower depth limit of deposit feeders                                                   | m                      | 0.3      |
| dQ6Y3X  | $d_Y^{SUSP}$       | Lower depth limit of suspension feeders                                                | m                      | 2.50E-03 |
| dQ6Y4x  | $d_Y^{MEIO}$       | Lower depth limit of meiobenthos                                                       | m                      | 3.00E-02 |
| dturX   | $\delta_{bturb}$   | Bioturbation length scale                                                              | m                      | 2.00E-02 |
| dwatY3X | $d_{SUSP}$         | Range of suspension feeders into the water column                                      | $m^{-1}$               | 1.       |
| EturX   | $\vartheta_{part}$ | Basal diffusivity of particulate matter                                                | $m^2 * d^{-1}$         | 2.00E-06 |
| hirrX   | $h_{birr}$         | Half-saturation rate for bioirrigation enhancement                                     | $mg * m^{-2} * d^{-1}$ | 101.     |
| h02Y2X  | $h_{\odot}^{DEPO}$ | Half-saturation content for oxygen limitation of deposit feeders                       | $mmol * m^{-3}$        | 0.00E+00 |
| h02Y3X  | $h_{\odot}^{SUSP}$ | Half-saturation content for oxygen limitation of suspension feeders                    | $mmol * m^{-3}$        | 0.00E+00 |
| h02Y4X  | $h_{\odot}^{MEIO}$ | Half-saturation content for oxygen limitation of meiobenthos                           | $mmol * m^{-3}$        | 0.00E+00 |
| hturX   | $h_{bturb}$        | Half-saturation rate for bioturbation enhancement                                      | $mg * m^{-2} * d^{-1}$ | 116.     |
| huY2X   | $f_{min}^{DEPO}$   | Food half-saturation content of the chance of encountering prey for deposit feeders    | $mg * m^{-2}$          | 3000     |
| huY3X   | $f_{min}^{SUSP}$   | Food half-saturation content of the chance of encountering prey for suspension feeders | $mg * m^{-2}$          | 300.     |

Continued on next page

Table 3 – continued from previous page

| Code ID                | Symbol                       | Description                                                                               | Unit                 | Value    |
|------------------------|------------------------------|-------------------------------------------------------------------------------------------|----------------------|----------|
| huY4X                  | <sup>MEIO</sup> $f_{min}$    | Food half-saturation content of the chance of encountering prey for meiobenthos           | mg * m <sup>-2</sup> | 1000.    |
| irr_minX               | $p_{bimin}$ :                | Minimum diffusion enhancement through bio irrigation                                      | 1                    | 2.       |
| luY2X                  | <sup>DEPO</sup> $h_{min}$    | Food half-saturation content for detection of individual prey types by deposit feeders    | mg * m <sup>-2</sup> | 250      |
| luY3X                  | <sup>SUSP</sup> $h_{min}$    | Food half-saturation content for detection of individual prey types of suspension feeders | mg * m <sup>-2</sup> | 10.      |
| luY4X                  | <sup>MEIO</sup> $h_{min}$    | Food half-saturation content for detection of individual prey types of meiobenthos        | mg * m <sup>-2</sup> | 50.      |
| mirrX                  | $p_{bienh}$                  | Maximal bioirrigation enhancement                                                         | 1                    | 10       |
| mturX                  | $p_{btenh}$                  | Maximal bioturbation enhancement                                                          | 1                    | 10.      |
| pdH1Q1X                | <sup>aer</sup> $q_{dmort}$   | Dissolved fraction of benthic aerobic bacteria mortality                                  | 1                    | 0.1      |
| pe_R1P1X               | <sup>dia</sup> $q_{ddepo}$   | Fraction of deposited diatoms decomposing into DOM                                        | 1                    | 0.2      |
| pe_R1P2X               | <sup>nano</sup> $q_{ddepo}$  | Fraction of deposited nanophytoplankton decomposing into DOM                              | 1                    | 0.5      |
| pe_R1P3X               | <sup>pico</sup> $q_{ddepo}$  | Fraction of deposited picophytoplankton decomposing into DOM                              | 1                    | 0.5      |
| pe_R1P4X               | <sup>micro</sup> $q_{ddepo}$ | Fraction of deposited microphytoplankton decomposing into DOM                             | 1                    | 0.5      |
| pe_R7P1X               | <sup>dia</sup> $q_{rdepo}$   | Fraction of deposited diatoms decomposing into refractory matter                          | 1                    | 5.00E-03 |
| pe_R7P2X               | <sup>nano</sup> $q_{rdepo}$  | Fraction of deposited nanophytoplankton decomposing into refractory matter                | 1                    | 5.00E-02 |
| Continued on next page |                              |                                                                                           |                      |          |

Table 3 – continued from previous page

| Code ID                | Symbol              | Description                                                                                               | Unit | Value    |
|------------------------|---------------------|-----------------------------------------------------------------------------------------------------------|------|----------|
| pe_R7P3X               | $q_{rdepo}^{pico}$  | Fraction of deposited nanophytoplankton decomposing into refractory matter                                | 1    | 5.00E-02 |
| pe_R7P4X               | $q_{rdepo}^{micro}$ | Fraction of deposited nanophytoplankton decomposing into refractory matter                                | 1    | 5.00E-02 |
| pe_R7R6X               | $q_{rdepo}^{part}$  | Fraction of deposited POM turning into refractory POM                                                     | 1    | 0.1      |
| pirrY2X                | $q_{birr}^{DEPO}$   | Fraction of deposit feeder uptake contributing to bioirrigation                                           | 1    | 1.       |
| pirrY4X                | $q_{birr}^{MEIO}$   | Fraction of meiobenthos uptake contributing to bioirrigation                                              | 1    | 0.2      |
| poroXr                 | $p_{poro}$          | Porosity volume correction factor                                                                         | 1    | 0.4      |
| pQIN3X                 | $q_{remin}^{ox}$    | Fraction of remineralisation of benthic matter going to nitrate (benthic remineralisation sub-model only) | 1    | 0.9      |
| pturY2X                | $q_{bturb}^{depo}$  | Fraction of deposit feeder uptake contributing to bioturbation                                            | 1    | 1.       |
| pudily2X               | $q_{dil}^{DEPO}$    | Relative nutrient content in the fecal pellets excreted by deposit feeders                                | 1    | 0.8      |
| pudily3X               | $q_{dil}^{SUSP}$    | Relative nutrient content in the fecal pellets excreted by suspension feeders                             | 1    | 0.8      |
| pudily4X               | $q_{dil}^{MEIO}$    | Relative nutrient content in the fecal pellets excreted by meiobenthos                                    | 1    | 0.8      |
| pue6H1Q1X              | $q_{dexcr}^{aer}$   | Excreted fraction of uptake of POM by benthic aerobic bacteria                                            | 1    | 0.1      |
| pue7H1Q1X              | $q_{rexcr}^{aer}$   | Excreted fraction of uptake of refractory matter by benthic aerobic bacteria                              | 1    | 0.1      |
| Continued on next page |                     |                                                                                                           |      |          |

Table 3 – continued from previous page

| Code ID                | Symbol                                                                               | Description                                                             | Unit | Value |
|------------------------|--------------------------------------------------------------------------------------|-------------------------------------------------------------------------|------|-------|
| pueQ6Y2X               | $q_{pexcr}^{DEPO}$                                                                   | Excreted fraction of uptake of particulate matter by deposit feeders    | 1    | 0.8   |
| pueQ6Y3X               | $q_{pexcr}^{SUSP}$                                                                   | Excreted fraction of uptake of particulate matter by suspension feeders | 1    | 0.85  |
| pueQ6Y4X               | $q_{pexcr}^{MEIO}$                                                                   | Excreted fraction of uptake of particulate matter by suspension feeders | 1    | 0.4   |
| pueY2X                 | $q_{excr}^{DEPO}$                                                                    | Excreted fraction of fixed uptake by deposit feeders                    | 1    | 0.35  |
| pueY3X                 | $q_{excr}^{SUSP}$                                                                    | Excreted fraction of fixed uptake by suspension feeders                 | 1    | 0.35  |
| pueY4X                 | $q_{excr}^{MEIO}$                                                                    | Excreted fraction of fixed uptake by meiobenthos                        | 1    | 0.25  |
| puH1Y2X                | $f_{pr} \left  \begin{smallmatrix} Y \\ aer \\ H \end{smallmatrix} \right.^{DEPO}$   | Food preference of deposit feeders for aerobic bacteria                 | 1    | 1.    |
| puH1Y3X                | $f_{pr} \left  \begin{smallmatrix} Y \\ aer \\ H \end{smallmatrix} \right.^{SUSP}$   | Food preference of suspension feeders for aerobic bacteria              | 1    | 1.    |
| puH1Y4X                | $f_{pr} \left  \begin{smallmatrix} Y \\ aer \\ H \end{smallmatrix} \right.^{MEIO}$   | Food preference of meiobenthos for aerobic bacteria                     | 1    | 1.    |
| puH2Y2X                | $f_{pr} \left  \begin{smallmatrix} Y \\ anaer \\ H \end{smallmatrix} \right.^{DEPO}$ | Food preference of deposit feeders for anaerobic bacteria               | 1    | 1.    |
| puH2Y4X                | $f_{pr} \left  \begin{smallmatrix} Y \\ anaer \\ H \end{smallmatrix} \right.^{MEIO}$ | Food preference of meiobenthos for anaerobic bacteria                   | 1    | 1.    |
| puinch1X               | $p_{nup}^{aer}$                                                                      | Preference factor for nutrient uptake by aerobic bacteria               | 1    | 2.    |
| puinch2X               | $p_{nup}^{anaer}$                                                                    | Preference factor of nutrient uptake by anaerobic bacteria              | 1    | 2.    |
| puP1Y3X                | $f_{pr} \left  \begin{smallmatrix} Y \\ dia \\ P \end{smallmatrix} \right.^{SUSP}$   | Food preference of suspension feeders for diatoms                       | 1    | 1.    |
| puP2Y3X                | $f_{pr} \left  \begin{smallmatrix} Y \\ nano \\ P \end{smallmatrix} \right.^{SUSP}$  | Food preference of suspension feeders for medium size phytoplankton     | 1    | 1.    |
| Continued on next page |                                                                                      |                                                                         |      |       |

Table 3 – continued from previous page

| Code ID                | Symbol                                             | Description                                                        | Unit | Value |
|------------------------|----------------------------------------------------|--------------------------------------------------------------------|------|-------|
| puP3Y3X                | $f_{pr} \Big _{\substack{SUSP \\ Y \\ PICO \\ P}}$ | Food preference of suspension feeders for small size phytoplankton | 1    | 1.    |
| puQ6Y2X                | $f_{pr} \Big _{\substack{DEPO \\ Y \\ SLOW \\ Q}}$ | Food preference of deposit feeders for POM                         | 1    | 0.1   |
| puQ6Y3X                | $f_{pr} \Big _{\substack{SUSP \\ Y \\ SLOW \\ Q}}$ | Food preference of suspension feeders for benthic POM              | 1    | 0.1   |
| puQ6Y4X                | $f_{pr} \Big _{\substack{MEIO \\ Y \\ SLOW \\ Q}}$ | Food preference of meiobenthos for POM                             | 1    | 0.3   |
| puR6Y3X                | $f_{pr} \Big _{\substack{SUSP \\ Y \\ MED \\ R}}$  | Food preference of suspension feeders for medium size POM          | 1    | 1.    |
| purH1X                 | $q_{aresp}^{aer}$                                  | Fraction of carbon uptake respired by benthic aerobic bacteria     | 1    | 0.3   |
| purH2X                 | $q_{aresp}^{anaer}$                                | Fraction of carbon uptake respired by benthic anaerobic bacteria   | 1    | 0.3   |
| purY2X                 | $q_{aresp}^{DEPO}$                                 | Respired fraction of uptake by deposit feeders                     | 1    | 0.35  |
| purY3X                 | $q_{aresp}^{SUSP}$                                 | Respired fraction of uptake by suspension feeders                  | 1    | 0.4   |
| purY4X                 | $q_{aresp}^{MEIO}$                                 | Respired fraction of uptake by meiobenthos                         | 1    | 0.45  |
| puY4Y2X                | $f_{pr} \Big _{\substack{DEPO \\ Y \\ MEIO \\ Y}}$ | Food preference of deposit feeders for meiobenthos                 | 1    | 1.    |
| puY4Y4X                | $f_{pr} \Big _{\substack{MEIO \\ Y \\ MEIO \\ Y}}$ | Food preference of meiobenthos for meiobenthos                     | 1    | 1.    |
| q10H1x                 | $\rho_{Q_{10}}^{aer}$                              | Regulating temperature factor Q10 for benthic aerobic bacteria     | 1    | 2.    |
| q10H2X                 | $\rho_{Q_{10}}^{anaer}$                            | Regulating temperature factor Q10 for benthic anaerobic bacteria   | 1    | 2.    |
| q10Y2X                 | $\rho_{Q_{10}}^{DEPO}$                             | Regulating temperature factor Q10 for deposit feeders              | 1    | 2.    |
| Continued on next page |                                                    |                                                                    |      |       |



Table 3 – continued from previous page

| Code ID  | Symbol                       | Description                                                                             | Unit                          | Value    |
|----------|------------------------------|-----------------------------------------------------------------------------------------|-------------------------------|----------|
| q10Y3X   | $\overset{SUSP}{p_{Q10}}$    | Regulating temperature factor Q10 for suspension feeders                                | 1                             | 2.       |
| q10Y4X   | $\overset{MEIO}{p_{Q10}}$    | Regulating temperature factor Q10 for meiobenthos                                       | 1                             | 2.       |
| qnHIcX   | $\overset{H}{q_{ref_{N:C}}}$ | Nitrogen to carbon ratio of benthic bacteria                                            | $\text{mol} * \text{g}^{-1}$  | 1.67E-02 |
| qnYIcX   | $\overset{Y}{q_{ref_{N:C}}}$ | Nitrogen to carbon ratio of benthic fauna                                               | $\text{mol} * \text{g}^{-1}$  | 1.19E-02 |
| qpHIcX   | $\overset{H}{q_{ref_{P:C}}}$ | Phosphorus to carbon ratio of benthic bacteria                                          | $\text{mol} * \text{g}^{-1}$  | 1.25E-03 |
| qpYIcX   | $\overset{Y}{q_{ref_{P:C}}}$ | Phosphorus to carbon ratio of benthic fauna                                             | $\text{mol} * \text{g}^{-1}$  | 7.92E-04 |
| reminQ1X | $\overset{dis}{r_{remin}}$   | Remineralisation rate of DOM (benthic remineralisation model only)                      | $\text{d}^{-1}$               | 0.1      |
| reminQ6X | $\overset{slow}{r_{remin}}$  | Remineralisation rate of slowly degradable matter (benthic remineralisation model only) | $\text{d}^{-1}$               | 5.00E-02 |
| reminQ7X | $\overset{refr}{r_{remin}}$  | Remineralisation rate of refractory matter (benthic remineralisation model only)        | $\text{d}^{-1}$               | 1.00E-02 |
| r102Y2x  | $\overset{DEPO}{p_{Omin}}$   | Minimum oxygen threshold of deposit feeders                                             | $\text{mmol} * \text{m}^{-3}$ | 0.00E+00 |
| r102Y3X  | $\overset{SUSP}{p_{Omin}}$   | Minimum oxygen threshold of suspension feeders                                          | $\text{mmol} * \text{m}^{-3}$ | 0.00E+00 |
| r102Y4X  | $\overset{MEIO}{p_{Omin}}$   | Minimum oxygen threshold of meiobenthos                                                 | $\text{mmol} * \text{m}^{-3}$ | 0.00E+00 |
| sdcY2X   | $\overset{DEPO}{r_{mortT}}$  | Specific mortality of deposit feeders induced at cold temperature                       | $\text{d}^{-1}$               | 2.20E-02 |
| sdcY3X   | $\overset{SUSP}{r_{mortT}}$  | Specific mortality of suspension feeders induced at cold temperature                    | $\text{d}^{-1}$               | 2.20E-02 |
| sdcY4X   | $\overset{MEIO}{r_{mortT}}$  | Specific mortality of meiobenthos induced at cold temperature                           | $\text{d}^{-1}$               | 2.00E-02 |
| sdH1X    | $\overset{aer}{r_{mort}}$    | Specific maximal mortality of benthic aerobic bacteria                                  | $\text{d}^{-1}$               | 5.00E-02 |

Continued on next page

Table 3 – continued from previous page

| Code ID                | Symbol                            | Description                                                                      | Unit                     | Value    |
|------------------------|-----------------------------------|----------------------------------------------------------------------------------|--------------------------|----------|
| sdH2X                  | $r_{mort}^{anaer}$                | Specific maximal mortality of benthic anaerobic bacteria                         | $d^{-1}$                 | 5.00E-02 |
| sdm02Y2X               | $r_{mort}^{DEPO}$                 | Specific maximal additional mortality of deposit feeders due to oxygen stress    | $d^{-1}$                 | 1.       |
| sdm02Y3X               | $r_{mort}^{SUSP}$                 | Specific maximal additional mortality of suspension feeders due to oxygen stress | $d^{-1}$                 | 1.       |
| sdm02Y4X               | $r_{mort}^{MEIO}$                 | Specific maximal additional mortality of meiobenthos due to oxygen stress        | $d^{-1}$                 | 1.       |
| sdY2X                  | $r_{mort}^{DEPO}$                 | Specific mortality of deposit feeders at reference temperature                   | $d^{-1}$                 | 1.00E-03 |
| sdY3X                  | $r_{mort}^{DEPO}$                 | Specific mortality of suspension feeders at reference temperature                | $d^{-1}$                 | 1.00E-03 |
| sdY4X                  | $r_{mort}^{DEPO}$                 | Specific mortality of meiobenthos at reference temperature                       | $d^{-1}$                 | 1.00E-02 |
| srH1X                  | $r_{resp}^{aer}$                  | Specific rest respiration of benthic aerobic bacteria                            | $d^{-1}$                 | 2.00E-02 |
| srH2X                  | $r_{resp}^{anaer}$                | Specific rest respiration of benthic anaerobic bacteria                          | $d^{-1}$                 | 2.00E-02 |
| srY2X                  | $r_{resp}^{DEPO}$                 | Specific rest respiration of deposit feeders at reference temperature            | $d^{-1}$                 | 2.70E-03 |
| srY3X                  | $r_{resp}^{SUSP}$                 | Specific rest respiration of suspension feeders at reference temperature         | $d^{-1}$                 | 2.70E-03 |
| srY4X                  | $r_{resp}^{MEIO}$                 | Specific rest respiration of meiobenthos at reference temperature                | $d^{-1}$                 | 1.00E-02 |
| suQ1H1X                | $r_{up}^{aer} \Big _{dis}^H Q$    | Specific DOC uptake by benthic aerobic bacteria                                  | $m^3 * mg^{-1} * d^{-1}$ | 5.00E-04 |
| suQ6fH1X               | $r_{fast}^{aer} \Big _{slow}^H Q$ | Specific fast nutrient limited detritus uptake by benthic aerobic bacteria       | $m^3 * mg^{-1} * d^{-1}$ | 2.00E-04 |
| Continued on next page |                                   |                                                                                  |                          |          |

Table 3 – continued from previous page

| Code ID                | Symbol                              | Description                                                                               | Unit                     | Value    |
|------------------------|-------------------------------------|-------------------------------------------------------------------------------------------|--------------------------|----------|
| suQ6fH2X               | $r_{fast}^{anaer} \big _{slow}^H Q$ | Specific fast nutrient limited POM uptake by benthic anaerobic bacteria                   | $m^3 * mg^{-1} * d^{-1}$ | 2.00E-04 |
| suQ6sH1X               | $r_{up}^{aer} \big _{slow}^H Q$     | Specific not nutrient limited detritus uptake by benthic aerobic bacteria                 | $m^3 * mg^{-1} * d^{-1}$ | 2.00E-05 |
| suQ6sH2X               | $r_{up}^{anaer} \big _{slow}^H Q$   | Specific not nutrient limited POM uptake by benthic anaerobic bacteria                    | $m^3 * mg^{-1} * d^{-1}$ | 2.00E-05 |
| suQ7H1X                | $r_{up}^{aer} \big _{refr}^H Q$     | Specific not nutrient limited refractory matter uptake by benthic aerobic bacteria        | $m^3 * mg^{-1} * d^{-1}$ | 2.00E-06 |
| suQ7H2X                | $r_{up}^{anaer} \big _{refr}^H Q$   | Specific not nutrient limited refractory matter uptake by benthic anaerobic bacteria      | $m^3 * mg^{-1} * d^{-1}$ | 2.00E-06 |
| suY2X                  | $DEPO g_{max}$                      | Specific maximal uptake by deposit feeders at reference temperature                       | $d^{-1}$                 | 0.11     |
| suY3X                  | $SUSP g_{max}$                      | Specific maximal uptake by suspension feeders at reference temperature                    | $d^{-1}$                 | 9.00E-02 |
| suY4X                  | $MEIO g_{max}$                      | Specific maximal uptake of meiobenthos at reference temperature                           | $d^{-1}$                 | 0.4      |
| xchY2X                 | $DEPO h_{crowd}$                    | Concentration determining asymptotic treshold of crowding limitation of deposit feeders   | $mg * m^{-2}$            | 5000     |
| xchY3X                 | $SUSP h_{crowd}$                    | Concentration determining asymptotic treshold of shading limitation of suspension feeders | $mg * m^{-2}$            | 5000.    |
| xc1Y2X                 | $DEPO p_C$                          | Lower treshold for crowding effect on food uptake by deposit feeders                      | $mg * m^{-2}$            | 2500     |
| xc1Y3X                 | $SUSP p_C$                          | Lower treshold for shading effect on food uptake by suspension feeders                    | $mg * m^{-2}$            | 2500.    |
| Continued on next page |                                     |                                                                                           |                          |          |

Table 3 – continued from previous page

| Code ID | Symbol                               | Description                                                                   | Unit                        | Value |
|---------|--------------------------------------|-------------------------------------------------------------------------------|-----------------------------|-------|
| xcsY2X  | $\overset{DEPO}{h_{sat}}$            | Michaelis-Menten constant for the impact of crowding on deposit feeders       | $\text{mg} * \text{m}^{-2}$ | 3000  |
| xcsY3X  | $\overset{SUSP}{h_{sat}}$            | Michaelis-Menten constant for the impact of crowding on suspension feeders    | $\text{mg} * \text{m}^{-2}$ | 3000. |
| xdcY2X  | $\frac{1}{\overset{DEPO}{T_{cold}}}$ | e-folding temperature factor of cold mortality response of deposit feeders    | $^{\circ}\text{C}^{-1}$     | -0.7  |
| xdcY3X  | $\frac{1}{\overset{SUSP}{T_{cold}}}$ | e-folding temperature factor of cold mortality response of suspension feeders | $^{\circ}\text{C}^{-1}$     | -0.7  |
| xdcY4X  | $\frac{1}{\overset{MEIO}{T_{cold}}}$ | e-folding temperature factor of cold mortality response of meiobenthos        | $^{\circ}\text{C}^{-1}$     | -0.7  |

## 1.4 calc.nml: calcParameters

| Code ID | Symbol                      | Description                                                                                | Unit                       | Value |
|---------|-----------------------------|--------------------------------------------------------------------------------------------|----------------------------|-------|
| bendiss | $\overset{calc}{r_{remin}}$ | Dissolution rate in the sediments                                                          | $\text{d}^{-1}$            | 0.05  |
| gutdiss | $q_{gutdiss}$               | Fraction of excreted zooplankton uptake of nanophytoplankton contributing to calcification | 1                          | 0.5   |
| KcalomX | $h_{calc}$                  | Half-saturation constant for calcification limitation from saturation state                | 1                          | 0.40  |
| ncalc   | $n_{calc}$                  | Power of the calcification law                                                             | 1                          | 0.81  |
| ndiss   | $n_{dis}$                   | Power of the dissolution law                                                               | 1                          | 2.22  |
| Rain0   | $q_{rain0}$                 | Max rain ratio                                                                             | 1                          | 0.6   |
| sedL2   | $p$                         | Sedimentation velocity of free liths                                                       | $\text{m} * \text{d}^{-1}$ | 10.0  |
| sL203X  | $r_{dis}$                   | Maximum specific dissolution rate                                                          | $\text{d}^{-1}$            | 0.03  |

## 1.5 d3morf.nml: d3morfParameters

| Code ID | Symbol          | Description                         | Unit            | Value    |
|---------|-----------------|-------------------------------------|-----------------|----------|
| EPS0Xr  | $\Lambda_{sea}$ | Light extinction of (pure) seawater | $\text{m}^{-1}$ | 4.00E-02 |

Continued on next page

Table 5 – continued from previous page

| Code ID | Symbol               | Description                                            | Unit                       | Value    |
|---------|----------------------|--------------------------------------------------------|----------------------------|----------|
| EPSESSX | $\lambda_{R_{susp}}$ | Specific light extinction of silt                      | $\text{m}^2\text{mg}^{-2}$ | 4.00E-05 |
| EPSP1X  | $\lambda_{dia}^P$    | Specific light extinction of diatoms                   | $\text{m}^2\text{mg}^{-2}$ | 5.00E-04 |
| EPSP2X  | $\lambda_{nano}^P$   | Specific light extinction of medium size phytoplankton | $\text{m}^2\text{mg}^{-2}$ | 4.00E-04 |
| EPSP3X  | $\lambda_{pico}^P$   | Specific light extinction of picophytoplankton         | $\text{m}^2\text{mg}^{-2}$ | 4.00E-04 |
| EPSP4X  | $\lambda_{micro}^P$  | Specific light extinction of microphytoplankton        | $\text{m}^2\text{mg}^{-2}$ | 4.00E-04 |
| EPSR6X  | $\lambda_R$          | Specific light extinction of medium size POM           | $\text{m}^2\text{mg}^{-2}$ | 1.00E-04 |

## 1.6 fmatrix.nml: fmatrixParameters

| Code ID  | Symbol                          | Description                                                | Unit | Value  |
|----------|---------------------------------|------------------------------------------------------------|------|--------|
| suB1_Z4X | $f_{pr} \Big _B^{MESO Z}$       | Food preference of mesozooplankton for bacteria            | 1    | 0.E0   |
| suB1_Z5X | $f_{pr} \Big _B^{MICRO Z}$      | Food preference of microzooplankton for bacteria           | 1    | .1E0   |
| suB1_Z6X | $f_{pr} \Big _B^{HET Z}$        | Food preference of heteroflagellates for bacteria          | 1    | .45E0  |
| suP1_Z4X | $f_{pr} \Big _{dia}^{MESO Z}$   | Food preference of mesozooplankton for diatoms             | 1    | .15E0  |
| suP1_Z5X | $f_{pr} \Big _{dia}^{MICRO Z}$  | Food preference of microzooplankton for diatoms            | 1    | .15E0  |
| suP2_Z4X | $f_{pr} \Big _{nano}^{MESO Z}$  | Food preference of mesozooplankton for nanophytoplankton   | 1    | 0.05E0 |
| suP2_Z5X | $f_{pr} \Big _{nano}^{MICRO Z}$ | Food preference of microzooplankton for nanophytoplankton  | 1    | .15E0  |
| suP2_Z6X | $f_{pr} \Big _{nano}^{HET Z}$   | Food preference of heteroflagellates for nanophytoplankton | 1    | .15E0  |
| suP3_Z4X | $f_{pr} \Big _{pico}^{MESO Z}$  | Food preference of mesozooplankton for picophytoplankton   | 1    | 0.E0   |
| suP3_Z5X | $f_{pr} \Big _{pico}^{MICRO Z}$ | Food preference of microzooplankton for picophytoplankton  | 1    | .15E0  |

Continued on next page

Table 6 – continued from previous page

| Code ID  | Symbol                                                                                 | Description                                                | Unit | Value |
|----------|----------------------------------------------------------------------------------------|------------------------------------------------------------|------|-------|
| suP3_Z6X | $f_{pr} \left  \begin{smallmatrix} HET \\ Z \\ PICO \\ P \end{smallmatrix} \right.$    | Food preference of heteroflagellates for picophytoplankton | 1    | .25E0 |
| suP4_Z4X | $f_{pr} \left  \begin{smallmatrix} MESO \\ Z \\ MICRO \\ P \end{smallmatrix} \right.$  | Food preference of mesozooplankton for microphytoplankton  | 1    | .15E0 |
| suP4_Z5X | $f_{pr} \left  \begin{smallmatrix} MICRO \\ Z \\ MICRO \\ P \end{smallmatrix} \right.$ | Food preference of microzooplankton for microphytoplankton | 1    | .1E0  |
| suR6_Z4X | $f_{pr} \left  \begin{smallmatrix} HET \\ Z \\ MED \\ R \end{smallmatrix} \right.$     | Food preference of mesozooplankton for medium size POM     | 1    | .1E0  |
| suZ4_Z4X | $f_{pr} \left  \begin{smallmatrix} MESO \\ Z \\ MESO \\ Z \end{smallmatrix} \right.$   | Food preference of mesozooplankton for mesozooplankton     | 1    | .25E0 |
| suZ5_Z4X | $f_{pr} \left  \begin{smallmatrix} MESO \\ Z \\ MICRO \\ Z \end{smallmatrix} \right.$  | Food preference of mesozooplankton for microzooplankton    | 1    | .25E0 |
| suZ5_Z5X | $f_{pr} \left  \begin{smallmatrix} MICRO \\ Z \\ MICRO \\ Z \end{smallmatrix} \right.$ | Food preference of microzooplankton for microzooplankton   | 1    | .15E0 |
| suZ6_Z4X | $f_{pr} \left  \begin{smallmatrix} MESO \\ Z \\ HET \\ Z \end{smallmatrix} \right.$    | Food preference of mesozooplankton for heteroflagellates   | 1    | .05E0 |
| suZ6_Z5X | $f_{pr} \left  \begin{smallmatrix} MICRO \\ Z \\ HET \\ Z \end{smallmatrix} \right.$   | Food preference of microzooplankton for heteroflagellates  | 1    | .2E0  |
| suZ6_Z6X | $f_{pr} \left  \begin{smallmatrix} HET \\ Z \\ HET \\ Z \end{smallmatrix} \right.$     | Food preference of heteroflagellates for heteroflagellates | 1    | .15E0 |

## 1.7 heterotrophic\_nanoflagellate.nml: erotropic\_nanoflagellate\_parameters

het-

| Code ID    | Symbol            | Description                                                                                   | Unit          | Value |
|------------|-------------------|-----------------------------------------------------------------------------------------------|---------------|-------|
| chrZ6oX    | $h_{\odot}^{HET}$ | Saturation constant for oxygen limitation of heteroflagellates                                | 1             | 7.81  |
| chuZ6cX    | $h_{up}^{HET}$    | Predation efficiency constant limiting the chances of encountering prey for heteroflagellates | $mg * m^{-3}$ | 28.   |
| minfoodZ6X | $h_{min}^{HET}$   | Michaelis-Menten constant to perceive food for heteroflagellates                              | $mg * m^{-3}$ | 12.   |

Continued on next page

Table 7 – continued from previous page

| Code ID   | Symbol             | Description                                                             | Unit                  | Value    |
|-----------|--------------------|-------------------------------------------------------------------------|-----------------------|----------|
| pe_R1Z6X  | $q_{dloss}^{HET}$  | DOM-Fraction of heteroflagellate excretion and mortality                | 1                     | 0.5      |
| pu_eaZ6X  | $q_{excr}^{HET}$   | Excreted fraction of uptake by heteroflagellates                        | 1                     | 0.5      |
| puZ6X     | $q_{eff}^{HET}$    | Relative heteroflagellates assimilation efficiency                      | 1                     | 0.4      |
| q10Z6X    | $p_{Q_{10}}^{HET}$ | Regulating temperature factor Q10 for heteroflagellates                 | 1                     | 2.       |
| qnZ6cX    | $q_{refN:C}^{HET}$ | Maximal nitrogen to carbon ratio of heteroflagellates                   | mol * g <sup>-1</sup> | 1.67E-02 |
| qpZ6cX    | $q_{refP:C}^{HET}$ | Maximal phosphorus to carbon ratio of heteroflagellates                 | mol * g <sup>-1</sup> | 1.00E-03 |
| sdZ6oX    | $p_{mortO}^{HET}$  | Specific mortality of heteroflagellates due to oxygen limitation        | d <sup>-1</sup>       | 0.3      |
| sdZ6X     | $p_{mort}^{HET}$   | Specific basal mortality of heteroflagellates                           | d <sup>-1</sup>       | 5.00E-02 |
| srsZ6X    | $r_{resp}^{HET}$   | Specific rest respiration of heteroflagellates at reference temperature | d <sup>-1</sup>       | 2.50E-02 |
| stempZ6nX | $r_{reN}^{HET}$    | Specific ammonium excretion rate of heteroflagellates                   | d <sup>-1</sup>       | 0.5      |
| stempZ6pX | $r_{reP}^{HET}$    | Specific phosphate excretion rate of heteroflagellates                  | d <sup>-1</sup>       | 0.5      |
| sumZ6X    | $g_{max}^{HET}$    | Maximal specific uptake of heteroflagellates at reference temperature   | d <sup>-1</sup>       | 1.5      |

## 1.8 iop.nml: iopParameters

| Code ID | Symbol        | Description                                   | Unit                            | Value |
|---------|---------------|-----------------------------------------------|---------------------------------|-------|
| a0w     | $a_{sea}$     | Adsorption coefficient of clear water         | m <sup>-1</sup>                 | .03   |
| adR4    | $a_{small}^*$ | Specific adsorption coefficient of small POC  | m <sup>2</sup> mg <sup>-2</sup> | 1.e-5 |
| adR6    | $a_{med}^*$   | Specific adsorption coefficient of medium POC | m <sup>2</sup> mg <sup>-2</sup> | 1.e-5 |
| adR8    | $a_{large}^*$ | Specific adsorption coefficient of large POC  | m <sup>2</sup> mg <sup>-2</sup> | 1.e-5 |

Continued on next page

Table 8 – continued from previous page

| Code ID | Symbol        | Description                                               | Unit         | Value  |
|---------|---------------|-----------------------------------------------------------|--------------|--------|
| aphP1   | $a_{dia}^*$   | Specific adsorption coefficient of diatoms                | $m^2mg^{-2}$ | .007   |
| aphP2   | $a_{nano}^*$  | Specific adsorption coefficient of nanophytoplankton      | $m^2mg^{-2}$ | .0041  |
| aphP3   | $a_{pico}^*$  | Specific adsorption coefficient of picophytoplankton      | $m^2mg^{-2}$ | .023   |
| aphP4   | $a_{micro}^*$ | Specific adsorption coefficient of microphytoplankton     | $m^2mg^{-2}$ | .008   |
| b0w     | $b_{sea}$     | Backscattering coefficient of clear water                 | $m^{-1}$     | .0015  |
| bbR4    | $b_{small}^*$ | Specific backscattering coefficient of small POC          | $m^2mg^{-2}$ | 1.6e-5 |
| bbR6    | $b_{med}^*$   | Specific backscattering coefficient of medium POC         | $m^2mg^{-2}$ | 1.6e-5 |
| bbR8    | $b_{large}^*$ | Specific backscattering coefficient of large POC          | $m^2mg^{-2}$ | 1.6e-5 |
| bphP1   | $b_{dia}^*$   | Specific backscattering coefficient of diatoms            | $m^2mg^{-2}$ | .00048 |
| bphP2   | $b_{nano}^*$  | Specific backscattering coefficient of nanophytoplankton  | $m^2mg^{-2}$ | .003   |
| bphP3   | $b_{pico}^*$  | Specific backscattering coefficient of picophytoplankton  | $m^2mg^{-2}$ | .003   |
| bphP4   | $b_{micro}^*$ | Specific backscattering coefficient of microphytoplankton | $m^2mg^{-2}$ | .00048 |

## 1.9 mesozoo.nml: mesozooParameters

| Code ID                | Symbol             | Description                                                                                   | Unit          | Value |
|------------------------|--------------------|-----------------------------------------------------------------------------------------------|---------------|-------|
| chrZ4oX                | $^{MESO}h_{\odot}$ | Saturation constant for oxygen limitation of mesozooplankton                                  | 1             | 7.81  |
| chuZ4cX                | $^{MESO}h_{up}$    | Predation efficiency constant limiting the chances of encountering prey for heteroflagellates | $mg * m^{-3}$ | 36.   |
| minfoodZ4X             | $^{MESO}h_{min}$   | Michaelis-Menten constant to perceive food for mesozooplankton                                | $mg * m^{-3}$ | 12.   |
| pe_R1Z4X               | $^{MESO}q_{dloss}$ | DOM-fraction of mesozooplankton excretion and mortality                                       | 1             | 0.5   |
| pu_eaRZ4X              | $^{MESO}q_{Rexcr}$ | Excreted fraction of POM uptake by mesozooplankton                                            | 1             | 0.9   |
| Continued on next page |                    |                                                                                               |               |       |



Table 9 – continued from previous page

| Code ID  | Symbol                                    | Description                                                           | Unit            | Value    |
|----------|-------------------------------------------|-----------------------------------------------------------------------|-----------------|----------|
| pu_eaZ4X | <sup>MESO</sup> $q_{excr}$                | Excreted fraction of uptake by mesozooplankton                        | 1               | 0.5      |
| puZ4X    | <sup>MESO</sup> $q_{eff}$                 | Relative mesoplankton assimilation efficiency                         | 1               | 0.6      |
| q10Z4X   | <sup>MESO</sup> $p_{Q_{10}}$              | Regulating temperature factor Q10 for mesozooplankton                 | 1               | 2.       |
| sdZ4oX   | <sup>MESO</sup> $p_{mort\textcircled{O}}$ | Specific mortality of mesozooplankton due to oxygen limitation        | d <sup>-1</sup> | 0.2      |
| sdZ4X    | <sup>MESO</sup> $p_{mort}$                | Specific basal mortality of mesozooplankton                           | d <sup>-1</sup> | 5.00E-02 |
| srsZ4X   | <sup>MESO</sup> $r_{resp}$                | Specific rest respiration of mesozooplankton at reference temperature | d <sup>-1</sup> | 1.50E-02 |
| sumZ4X   | <sup>MESO</sup> $g_{max}$                 | Maximal specific uptake of mesozooplankton at reference temperature   | d <sup>-1</sup> | 1.       |
| Z4mortX  | $r_{owmort}$                              | Specific overwintering mortality of mesozooplankton                   | d <sup>-1</sup> | 2.50E-03 |
| Z4repwX  | $r_{owresp}$                              | Specific overwintering respiration of mesozooplankton                 | d <sup>-1</sup> | 2.50E-03 |

## 1.10 microzoo.nml: microzooParameters

| Code ID    | Symbol                                 | Description                                                                                  | Unit                 | Value |
|------------|----------------------------------------|----------------------------------------------------------------------------------------------|----------------------|-------|
| chrZ5oX    | <sup>MICRO</sup> $h_{\textcircled{O}}$ | Saturation constant for oxygen limitation of microzooplankton                                | 1                    | 7.81  |
| chuZ5cX    | <sup>MICRO</sup> $h_{up}$              | Predation efficiency constant limiting the chances of encountering prey for microzooplankton | mg * m <sup>-3</sup> | 32.   |
| minfoodZ5X | <sup>MICRO</sup> $h_{min}$             | Michaelis-Menten constant to perceive food for microzooplankton                              | mg * m <sup>-3</sup> | 12.   |
| pe_R1Z5X   | <sup>MICRO</sup> $q_{dloss}$           | DOM-Fraction of microzooplankton excretion and mortality                                     | 1                    | 0.5   |

Continued on next page

Table 10 – continued from previous page

| Code ID   | Symbol                           | Description                                                            | Unit                         | Value    |
|-----------|----------------------------------|------------------------------------------------------------------------|------------------------------|----------|
| pu_eaZ5X  | $\overset{MICRO}{q}_{excr}$      | Excreted fraction of uptake by microzooplankton                        | 1                            | 0.5      |
| puZ5X     | $\overset{MICRO}{q}_{eff}$       | Relative microplankton assimilation efficiency                         | 1                            | 0.5      |
| q10Z5X    | $\overset{MICRO}{p}_{Q_{10}}$    | Regulating temperature factor Q10 for microzooplankton                 | 1                            | 2.       |
| qnZ5cX    | $\overset{MICRO}{q}_{ref_{N:C}}$ | Maximal nitrogen to carbon ratio of microzooplankton                   | $\text{mol} * \text{g}^{-1}$ | 1.67E-02 |
| qpZ5cX    | $\overset{MICRO}{q}_{ref_{P:C}}$ | Maximal phosphorus to carbon ratio of microzooplankton                 | $\text{mol} * \text{g}^{-1}$ | 1.00E-03 |
| sdZ5oX    | $\overset{MICRO}{p}_{mortO}$     | Specific mortality of microzooplankton due to oxygen limitation        | $\text{d}^{-1}$              | 0.25     |
| sdZ5X     | $\overset{MICRO}{p}_{mort}$      | Specific basal mortality of microzooplankton                           | $\text{d}^{-1}$              | 5.00E-02 |
| srsZ5X    | $\overset{MICRO}{r}_{resp}$      | Specific rest respiration of microzooplankton at reference temperature | $\text{d}^{-1}$              | 2.00E-02 |
| stempZ5nX | $\overset{MICRO}{r}_{relN}$      | Specific ammonium excretion rate of microzooplankton                   | $\text{d}^{-1}$              | 0.5      |
| stempZ5pX | $\overset{MICRO}{r}_{relP}$      | Specific phosphate excretion rate of microzooplankton                  | $\text{d}^{-1}$              | 0.5      |
| sumZ5X    | $\overset{MICRO}{g}_{max}$       | Maximal specific uptake of microzooplankton at reference temperature   | $\text{d}^{-1}$              | 1.25     |

### 1.11 ox.nml: oxParameters

| Code ID | Symbol                    | Description                         | Unit | Value |
|---------|---------------------------|-------------------------------------|------|-------|
| pco2a3  | $\overset{air}{p}_{CO_2}$ | Partial pressure of atmospheric CO2 | ppm  | 385.  |

### 1.12 pel.nml: pelParameters

| Code ID  | Symbol                  | Description                                           | Unit                        | Value |
|----------|-------------------------|-------------------------------------------------------|-----------------------------|-------|
| MinpreyX | $\overset{ow}{p}_{min}$ | Food threshold for overwintering state of zooplankton | $\text{mg} * \text{m}^{-2}$ | 300.  |

Continued on next page

Table 12 – continued from previous page

| Code ID  | Symbol                              | Description                                                       | Unit                         | Value   |
|----------|-------------------------------------|-------------------------------------------------------------------|------------------------------|---------|
| qnZIcX   | <sup>MESO</sup> $q_{N:C}$           | Fixed nitrogen to carbon ratio of mesozooplankton                 | $\text{mol} * \text{g}^{-1}$ | 1.26E-2 |
| qpZIcX   | <sup>MESO</sup> $q_{P:C}$           | Fixed phosphate to carbon ratio of mesozooplankton                | $\text{mol} * \text{g}^{-1}$ | 7.86E-4 |
| R1R2X    | $q_{lab}$                           | Labile fraction of DOM production                                 | 1                            | 1.      |
| uB1c_02X | <sup>syn</sup> $p_{\text{O}}$       | Conversion of carbon into oxygen produced                         | $\text{mol} * \text{g}^{-1}$ | 0.11    |
| urB1_02X | <sup>resp</sup> $p_{\text{O}}$      | Conversion of carbon into oxygen respired                         | $\text{mol} * \text{g}^{-1}$ | 0.1     |
| xR1nX    | <sup>lab</sup> $p_{\text{cyto}_N}$  | Nitrogen fraction in cytoplasm of DOM vs. structural components   | 1                            | 1.      |
| xR1pX    | <sup>lab</sup> $p_{\text{cyto}_P}$  | Phosphorus fraction in cytoplasm of DOM vs. structural components | 1                            | 1.2     |
| xR7nX    | <sup>part</sup> $p_{\text{cyto}_N}$ | Nitrogen fraction in cytoplasm of POM vs. structural components   | 1                            | 1.      |
| xR7pX    | <sup>part</sup> $p_{\text{cyto}_P}$ | Phosphorus fraction in cytoplasm of POM vs. structural components | 1                            | 0.6     |

### 1.13 primary\_producers.nml: primary\_producer\_parameters

| Code ID  | Symbol                         | Description                                      | Unit                                                     | Value |
|----------|--------------------------------|--------------------------------------------------|----------------------------------------------------------|-------|
| alphaP1X | <sup>dia</sup> $\alpha_{PI}$   | Initial slope of PI-curve for diatoms            | $\text{mg} * \text{m}^2 * \text{W}^{-1} * \text{d}^{-1}$ | 4.    |
| alphaP2X | <sup>nano</sup> $\alpha_{PI}$  | Initial slope of PI-curve for nanophytoplankton  | $\text{mg} * \text{m}^2 * \text{W}^{-1} * \text{d}^{-1}$ | 5.    |
| alphaP3X | <sup>pico</sup> $\alpha_{PI}$  | Initial slope of PI-curve for picophytoplankton  | $\text{mg} * \text{m}^2 * \text{W}^{-1} * \text{d}^{-1}$ | 6.    |
| alphaP4X | <sup>micro</sup> $\alpha_{PI}$ | Initial slope of PI-curve for microphytoplankton | $\text{mg} * \text{m}^2 * \text{W}^{-1} * \text{d}^{-1}$ | 3.    |
| betaP1X  | <sup>dia</sup> $\beta_{PI}$    | Photo-inhibition paramter for diatoms            | $\text{mg} * \text{m}^2 * \text{W}^{-1} * \text{d}^{-1}$ | 7.E-2 |
| betaP2X  | <sup>nano</sup> $\beta_{PI}$   | Photo-inhibition paramter for nanophytoplankton  | $\text{mg} * \text{m}^2 * \text{W}^{-1} * \text{d}^{-1}$ | 1.E-1 |

Continued on next page

Table 13 – continued from previous page

| Code ID                | Symbol                    | Description                                                                        | Unit                         | Value  |
|------------------------|---------------------------|------------------------------------------------------------------------------------|------------------------------|--------|
| betaP3X                | $\beta_{PI}^{pico}$       | Photo-inhibition paramter for picophytoplankton                                    | $mg * m^2 * W^{-1} * d^{-1}$ | 1.2E-1 |
| betaP4X                | $\beta_{PI}^{micro}$      | Photo-inhibition paramter for microphytoplankton                                   | $mg * m^2 * W^{-1} * d^{-1}$ | 6.E-2  |
| chP1sX                 | $h_S^{dia}$               | Michaelis-Menten constant for Silicate limitation                                  | $mmol * m^{-3}$              | .2     |
| esNIP1X                | $p_{sink}^{dia}$          | Level of nutrient limitation below which diatoms subside                           | 1                            | 0.7    |
| esNIP2X                | $p_{sink}^{nano}$         | Level of nutrient limitation below which nanophytoplankton subsides                | 1                            | 0.7    |
| esNIP3X                | $p_{sink}^{pico}$         | Level of nutrient limitation below which picophytoplankton subsides                | 1                            | 0.7    |
| esNIP4X                | $p_{sink}^{micro}$        | Level of nutrient limitation below which microphytoplankton subsides               | 1                            | 0.7    |
| peir_eowX              | $q_{PAR}$                 | photosynthetically available fraction of irradiation                               | 1                            | 0.5    |
| phimP1X                | $q_{\varphi max}^{dia}$   | Maximal effective chlorophyll to carbon photosynthesis ratio of diatoms            | 1                            | 6.E-2  |
| phimP2X                | $q_{\varphi max}^{nano}$  | Maximal effective chlorophyll to carbon photosynthesis ratio of nanophytoplankton  | 1                            | 2.5E-2 |
| phimP3X                | $q_{\varphi max}^{pico}$  | Maximal effective chlorophyll to carbon photosynthesis ratio of picophytoplankton  | 1                            | 1.5E-2 |
| phimP4X                | $q_{\varphi max}^{micro}$ | Maximal effective chlorophyll to carbon photosynthesis ratio of microphytoplankton | 1                            | 4.5E-2 |
| pu_eaP1X               | $q_{excr}^{dia}$          | Excreted fraction of primary production by diatoms                                 | 1                            | 0.2    |
| pu_eaP2X               | $q_{excr}^{nano}$         | Excreted fraction of primary production by nanophytoplankton                       | 1                            | 0.2    |
| Continued on next page |                           |                                                                                    |                              |        |

Table 13 – continued from previous page

| Code ID  | Symbol                  | Description                                                                          | Unit                             | Value  |
|----------|-------------------------|--------------------------------------------------------------------------------------|----------------------------------|--------|
| pu_eaP3X | $q_{excr}^{pico}$       | Excreted fraction of primary production by picophytoplankton                         | 1                                | 0.2    |
| pu_eaP4X | $q_{excr}^{micro}$      | Excreted fraction of primary production by microphytoplankton                        | 1                                | 0.2    |
| pu_raP1X | $q_{aresp}^{dia}$       | Respired fraction of primary production by diatoms (activity respiration)            | 1                                | 0.2    |
| pu_raP2X | $q_{aresp}^{nano}$      | Respired fraction of primary production by nanophytoplankton (activity respiration)  | 1                                | 0.2    |
| pu_raP3X | $q_{aresp}^{pico}$      | Respired fraction of primary production by picophytoplankton (activity respiration)  | 1                                | 0.2    |
| pu_raP4X | $q_{aresp}^{micro}$     | Respired fraction of primary production by microphytoplankton (activity respiration) | 1                                | 0.2    |
| q10P1X   | $p_{Q_{10}}^{dia}$      | Regulating temperature factor Q10 for diatoms                                        | 1                                | 2.     |
| q10P2X   | $p_{Q_{10}}^{nano}$     | Regulating temperature factor Q10 for nanophytoplankton                              | 1                                | 2.     |
| q10P3X   | $p_{Q_{10}}^{pico}$     | Regulating temperature factor Q10 for picophytoplankton                              | 1                                | 2.     |
| q10P4X   | $p_{Q_{10}}^{micro}$    | Regulating temperature factor Q10 for microphytoplankton                             | 1                                | 2.     |
| qf1P1cX  | $q_{min_{F:C}}^{dia}$   | Minimal iron to carbon ratio of diatoms                                              | $\mu\text{mol} * \text{mg}^{-1}$ | 5.E-5  |
| qf1P2cX  | $q_{min_{F:C}}^{nano}$  | Minimal iron to carbon ratio of nanophytoplankton                                    | $\mu\text{mol} * \text{mg}^{-1}$ | 1.E-4  |
| qf1P3cX  | $q_{min_{F:C}}^{pico}$  | Minimal iron to carbon ratio of picophytoplankton                                    | $\mu\text{mol} * \text{mg}^{-1}$ | 1.5E-4 |
| qf1P4cX  | $q_{min_{F:C}}^{micro}$ | Minimal iron to carbon ratio of microphytoplankton                                   | $\mu\text{mol} * \text{mg}^{-1}$ | 5.E-5  |
| qfRP1cX  | $q_{ref_{F:C}}^{dia}$   | Maximal/optimal iron to carbon ratio of diatoms                                      | $\mu\text{mol} * \text{mg}^{-1}$ | 5.E-4  |
| qfRP2cX  | $q_{min_{F:C}}^{nano}$  | Maximal/optimal iron to carbon ratio of nanophytoplankton                            | $\mu\text{mol} * \text{mg}^{-1}$ | 3.E-4  |

Continued on next page

Table 13 – continued from previous page

| Code ID                | Symbol                  | Description                                                | Unit                                          | Value       |
|------------------------|-------------------------|------------------------------------------------------------|-----------------------------------------------|-------------|
| qfRP3cX                | $q_{min_{F:C}}^{pico}$  | Maximal/optimal iron to carbon ratio of picophytoplankton  | $\mu\text{mol} * \text{mg}^{-1}$              | 5 . E - 4   |
| qfRP4cX                | $q_{min_{F:C}}^{micro}$ | Maximal/optimal iron to carbon ratio of microphytoplankton | $\mu\text{mol} * \text{mg}^{-1}$              | 5 . E - 4   |
| qn1P1cX                | $q_{min_{N:C}}^{dia}$   | Minimal nitrogen to carbon ratio for diatoms               | $\text{mol} * \text{g}^{-1}$                  | 4 . 2E - 3  |
| qn1P2cX                | $q_{min_{N:C}}^{nano}$  | Minimal nitrogen to carbon ratio for nanophytoplankton     | $\text{mol} * \text{g}^{-1}$                  | 5 . E - 3   |
| qn1P3cX                | $q_{min_{N:C}}^{pico}$  | Minimal nitrogen to carbon ratio for picophytoplankton     | $\text{mol} * \text{g}^{-1}$                  | 6 . E - 3   |
| qn1P4cX                | $q_{min_{N:C}}^{micro}$ | Minimal nitrogen to carbon ratio for microphytoplankton    | $\text{mol} * \text{g}^{-1}$                  | 4 . 2E - 3  |
| qnRPIcX                |                         | Inverse Redfield ratio of nitrogen to carbon               | $\text{mol} * \text{g}^{-1}$                  | 1 . 26E - 2 |
| qp1P1cX                | $q_{min_{P:C}}^{dia}$   | Minimal phosphorus to carbon ratio for diatoms             | $\text{mol} * \text{g}^{-1}$                  | 1 . E - 4   |
| qp1P2cX                | $q_{min_{P:C}}^{nano}$  | Minimal phosphorus to carbon ratio for nanophytoplankton   | $\text{mol} * \text{g}^{-1}$                  | 2 . 25E - 4 |
| qp1P3cX                | $q_{min_{P:C}}^{pico}$  | Minimal phosphorus to carbon ratio for picophytoplankton   | $\text{mol} * \text{g}^{-1}$                  | 3 . 5E - 4  |
| qp1P4cX                | $q_{min_{P:C}}^{micro}$ | Minimal phosphorus to carbon ratio for microphytoplankton  | $\text{mol} * \text{g}^{-1}$                  | 1 . E - 4   |
| qpRPIcX                |                         | Inverse Redfield ratio of Phosphorus to carbon             | $\text{mol} * \text{g}^{-1}$                  | 7 . 86E - 4 |
| qsP1cX                 | $q_{ref_{S:C}}^{dia}$   | Maximal silicon to carbon ratio of diatoms                 | $\text{mol} * \text{g}^{-1}$                  | 1 . 18E - 2 |
| quP1n3X                | $r_{aff_n}^{dia}$       | Nitrate affinity of diatoms                                | $\text{m}^3 * \text{mg}^{-1} * \text{d}^{-1}$ | 2 . 5E - 3  |
| quP1n4X                | $r_{aff_a}^{dia}$       | Ammonium affinity of diatoms                               | $\text{m}^3 * \text{mg}^{-1} * \text{d}^{-1}$ | 2 . 5E - 3  |
| quP2n3X                | $r_{aff_n}^{nano}$      | Nitrate affinity of nanophytoplankton                      | $\text{m}^3 * \text{mg}^{-1} * \text{d}^{-1}$ | 4 . E - 3   |
| quP2n4X                | $r_{aff_a}^{nano}$      | Ammonium affinity of nanophytoplankton                     | $\text{m}^3 * \text{mg}^{-1} * \text{d}^{-1}$ | 4 . E - 3   |
| quP3n3X                | $r_{aff_n}^{pico}$      | Nitrate affinity of picophytoplankton                      | $\text{m}^3 * \text{mg}^{-1} * \text{d}^{-1}$ | 6 . E - 3   |
| quP3n4X                | $r_{aff_a}^{pico}$      | Ammonium affinity of picophytoplankton                     | $\text{m}^3 * \text{mg}^{-1} * \text{d}^{-1}$ | 7 . E - 3   |
| Continued on next page |                         |                                                            |                                               |             |

Table 13 – continued from previous page

| Code ID | Symbol              | Description                                                   | Unit                     | Value  |
|---------|---------------------|---------------------------------------------------------------|--------------------------|--------|
| quP4n3X | $^{micro}r_{aff_n}$ | Nitrate affinity of microphytoplankton                        | $m^3 * mg^{-1} * d^{-1}$ | 2.E-3  |
| quP4n4X | $^{micro}r_{aff_a}$ | Ammonium affinity of microphytoplankton                       | $m^3 * mg^{-1} * d^{-1}$ | 2.E-3  |
| qurP1fX | $^{dia}r_{aff_F}$   | Iron affinity of diatoms                                      | $m^3 * mg^{-1} * d^{-1}$ | 3.E-4  |
| qurP1pX | $^{dia}r_{aff_P}$   | Phosphate affinity of diatoms                                 | $m^3 * mg^{-1} * d^{-1}$ | 3.E-3  |
| qurP2fX | $^{nano}r_{aff_F}$  | Iron affinity of nanophytoplankton                            | $m^3 * mg^{-1} * d^{-1}$ | 4.E-4  |
| qurP2pX | $^{nano}r_{aff_P}$  | Phosphate affinity of nanophytoplankton                       | $m^3 * mg^{-1} * d^{-1}$ | 4.E-3  |
| qurP3fX | $^{pico}r_{aff_F}$  | Iron affinity of picophytoplankton                            | $m^3 * mg^{-1} * d^{-1}$ | 6.E-4  |
| qurP3pX | $^{pico}r_{aff_P}$  | Phosphate affinity of picophytoplankton                       | $m^3 * mg^{-1} * d^{-1}$ | 6.E-3  |
| qurP4fX | $^{micro}r_{aff_F}$ | Iron affinity of microphytoplankton                           | $m^3 * mg^{-1} * d^{-1}$ | 2.E-4  |
| qurP4pX | $^{micro}r_{aff_P}$ | Phosphate affinity of microphytoplankton                      | $m^3 * mg^{-1} * d^{-1}$ | 2.E-3  |
| resP1mX | $^{dia}W_{lim}$     | Maximal subsiding velocity of diatoms                         | $m * d^{-1}$             | 5.     |
| resP2mX | $^{nano}W_{lim}$    | Maximal subsiding velocity of nanophytoplankton               | $m * d^{-1}$             | 0.E0   |
| resP3mX | $^{pico}W_{lim}$    | Maximal subsiding velocity of picophytoplankton               | $m * d^{-1}$             | 0.E0   |
| resP4mX | $^{micro}W_{lim}$   | Maximal subsiding velocity of microphytoplankton              | $m * d^{-1}$             | 5.     |
| sdoP1X  | $^{dia}r_{mort}$    | 1.1 of minimal specific mortality rate of diatoms             | $d^{-1}$                 | 5.E-2  |
| sdoP2X  | $^{nano}r_{mort}$   | 1.1 of minimal specific mortality rate of nanophytoplankton   | $d^{-1}$                 | 5.E-2  |
| sdoP3X  | $^{pico}r_{mort}$   | 1.1 of minimal specific mortality rate of picophytoplankton   | $d^{-1}$                 | 5.5E-2 |
| sdoP4X  | $^{micro}r_{mort}$  | 1.1 of minimal specific mortality rate of microphytoplankton  | $d^{-1}$                 | 4.5E-2 |
| srsP1X  | $^{dia}r_{resp}$    | Specific rest respiration of diatoms at reference temperature | $d^{-1}$                 | 4.E-2  |

Continued on next page

Table 13 – continued from previous page

| Code ID | Symbol                                 | Description                                                                           | Unit     | Value  |
|---------|----------------------------------------|---------------------------------------------------------------------------------------|----------|--------|
| srsP2X  | $r_{resp}^{nano}$                      | Specific rest respiration of nanophytoplankton at reference temperature               | $d^{-1}$ | 4.E-2  |
| srsP3X  | $r_{resp}^{pico}$                      | Specific rest respiration of picophytoplankton at reference temperature               | $d^{-1}$ | 4.5E-2 |
| srsP4X  | $r_{resp}^{micro}$                     | Specific rest respiration of microphytoplankton at reference temperature              | $d^{-1}$ | 3.5E-2 |
| sumP1X  | $g_{max}^{dia}$                        | Specific maximal productivity of diatoms at reference temperature                     | $d^{-1}$ | 1.375  |
| sumP2X  | $g_{max}^{nano}$                       | Specific maximal productivity of nanophytoplankton at reference temperature           | $d^{-1}$ | 1.625  |
| sumP3X  | $g_{max}^{pico}$                       | Specific maximal productivity of picophytoplankton at reference temperature           | $d^{-1}$ | 2.     |
| sumP4X  | $g_{max}^{micro}$                      | Specific maximal productivity of microphytoplankton at reference temperature          | $d^{-1}$ | 1.125  |
| xqcP1nX | $\frac{q_{ref_{N:C}}^{dia}}{qnRPICX}$  | Factor of qpRPICX giving the threshold for phosphorus limitation of diatoms           | 1        | 1.     |
| xqcP1pX | $\frac{q_{ref_{P:C}}^{dia}}{qpRPICX}$  | Factor of qpRPICX giving the threshold for nitrogen limitation of diatoms             | 1        | 1.     |
| xqcP2nX | $\frac{q_{ref_{N:C}}^{nano}}{qnRPICX}$ | Factor of qnRPICX giving the threshold for phosphorus limitation of nanophytoplankton | 1        | 1.     |
| xqcP2pX | $\frac{q_{ref_{P:C}}^{nano}}{qpRPICX}$ | Factor of qpRPICX giving the threshold for nitrogen limitation of nanophytoplankton   | 1        | 1.     |
| xqcP3nX | $\frac{q_{ref_{N:C}}^{pico}}{qnRPICX}$ | Factor of qnRPICX giving the threshold for phosphorus limitation of picophytoplankton | 1        | 1.     |

Continued on next page



Table 13 – continued from previous page

| Code ID | Symbol                               | Description                                                                            | Unit | Value |
|---------|--------------------------------------|----------------------------------------------------------------------------------------|------|-------|
| xqcP3pX | $\frac{q_{refP:C}^{pico}}{qpRPicX}$  | Factor of qpRPicX giving the threshold for nitrogen limitation of picophytoplankton    | 1    | 1.    |
| xqcP4nX | $\frac{q_{refN:C}^{micro}}{qnRPicX}$ | Factor of qnRPicX giving the threshold for phosphorus limitation of microphytoplankton | 1    | 1.    |
| xqcP4pX | $\frac{q_{refP:C}^{micro}}{qpRPicX}$ | Factor of qpRPicX giving the threshold for nitrogen limitation of microphytoplankton   | 1    | 1.    |
| xqnP1X  | $\frac{q_{maxN:C}^{dia}}{qnRPicX}$   | Factor of qnRPicX giving the maximal nitrogen to carbon ratio for diatoms              | 1    | 1.075 |
| xqnP2X  | $\frac{q_{maxN:C}^{nano}}{qnRPicX}$  | Factor of qnRPicX giving the maximal nitrogen to carbon ratio for nanophytoplankton    | 1    | 1.075 |
| xqnP3X  | $\frac{q_{maxN:C}^{pico}}{qnRPicX}$  | Factor of qnRPicX giving the maximal nitrogen to carbon ratio for picophytoplankton    | 1    | 1.05  |
| xqnP4X  | $\frac{q_{maxN:C}^{micro}}{qnRPicX}$ | Factor of qnRPicX giving the maximal nitrogen to carbon ratio for microphytoplankton   | 1    | 1.1   |
| xqpP1X  | $\frac{q_{maxP:C}^{dia}}{qpRPicX}$   | Factor of qpRPicX giving the maximal phosphorus to carbon ratio for diatoms            | 1    | 2.    |
| xqpP2X  | $\frac{q_{maxP:C}^{nano}}{qpRPicX}$  | Factor of qpRPicX giving the maximal phosphorus to carbon ratio for nanophytoplankton  | 1    | 2.    |
| xqpP3X  | $\frac{q_{maxP:C}^{pico}}{qpRPicX}$  | Factor of qpRPicX giving the maximal phosphorus to carbon ratio for picophytoplankton  | 1    | 1.5   |
| xqpP4X  | $\frac{q_{maxP:C}^{micro}}{qpRPicX}$ | Factor of qpRPicX giving the maximal phosphorus to carbon ratio for microphytoplankton | 1    | 2.7   |

## 1.14 sedimentation.nml: sedimentation\_parameters

| Code ID | Symbol                 | Description                             | Unit         | Value    |
|---------|------------------------|-----------------------------------------|--------------|----------|
| rP1mX   | $\overset{dia}{W}_0$   | sinking velocity of diatoms             | $m * d^{-1}$ | 0.00E+00 |
| rP2mX   | $\overset{nano}{W}_0$  | sinking velocity of nanophyto-plankton  | $m * d^{-1}$ | 0.00E+00 |
| rP3mX   | $\overset{pico}{W}_0$  | sinking velocity of picophyto-plankton  | $m * d^{-1}$ | 0.00E+00 |
| rP4mX   | $\overset{micro}{W}_0$ | sinking velocity of microphyto-plankton | $m * d^{-1}$ | 0.00E+00 |
| rR4mX   | $\overset{small}{W}_0$ | sinking velocity of small POM           | $m * d^{-1}$ | 1.       |
| rR6mX   | $\overset{med}{W}_0$   | sinking velocity of medium size POM     | $m * d^{-1}$ | 5.       |
| rR8mX   | $\overset{large}{W}_0$ | sinking velocity of large POM           | $m * d^{-1}$ | 10.      |

## 2 Complementary empirical relationships

Some empirical relations that complement the information in the article are given here. These comprise:

- the chemical equilibrium coefficients used in the sub-model for the carbonate system,
- the different options of alkalinity regressions from temperature and salinity from literature that are available in the model,
- saturation state equilibrium coefficients,
- resuspension coefficients.

### 2.1 Carbonate system equilibrium states

The solution of the carbonate system equations requires the chemical equilibrium coefficients, which are approximated from the regressions given below using ocean temperature, salinity and pressure.

The regression for constant  $k_0$  used to compute  $p_{CO_2}$  taken from [Weiss, 1974](#) is given by:

$$\log_e k_0 = \frac{93.4517}{\frac{T[K]}{100}} - 60.2409 + 23.3585 * \log_e \frac{T[K]}{100} + S[\text{psu}] * \left( 0.023517 - 0.023656 * \frac{T[K]}{100} + 0.0047036 * \left( \frac{T[K]}{100} \right)^2 \right).$$

The constants  $k_1$ ,  $k_2$  used to compute  $c_{[CO_2^*]}$ ,  $c_{HCO_3^-}$  are at reference conditions given by the formulation of [Millero, 1995](#) using the [Mehrbach et al., 1973](#) data on sea-

water scale:

$$\begin{aligned}
 -\log_{10} \tilde{k}_1 &= \frac{3670.7}{T[K]} - 62.008 + 9.7944 * \log_e T[K] - 0.0118 * S[\text{psu}] + 0.000116 * S[\text{psu}]^2 \\
 -\log_{10} \tilde{k}_2 &= \frac{1394.7}{T[K]} + 4.777 - 0.0184 * S[\text{psu}] + 0.000118 * S[\text{psu}]^2 .
 \end{aligned}$$

This formulation is amended considering the dependency on sea-water pressure following [Millero, 1995](#). For  $k_1$  the pressure dependency is derived from changes of volume and compressibility and given by

$$\begin{aligned}
 \Delta_v &= -25.5 + 0.1271 * T[^\circ\text{C}] \\
 \Delta_k &= \frac{(-3.08 + 0.0877 * T[^\circ\text{C}])}{1000} \\
 \log_e \frac{k_1}{\tilde{k}_1} &= \left( -\Delta_v + \frac{\Delta_k}{2} p[\text{bar}] \right) \frac{p[\text{bar}]}{R_{\text{gas}} T[K]} ,
 \end{aligned}$$

while for  $k_2$  it reads

$$\begin{aligned}
 \Delta_v &= -15.82 - 0.0219 * T[^\circ\text{C}] \\
 \Delta_k &= \frac{1.13 - 0.1475 * T[^\circ\text{C}]}{1000} \\
 \log_e \frac{k_2}{\tilde{k}_2} &= \left( -\Delta_v + \frac{\Delta_k}{2} p[\text{bar}] \right) \frac{p[\text{bar}]}{R_{\text{gas}} T[K]} .
 \end{aligned}$$

The constant  $k_b$  to determine  $c_{\text{B(OH)}_3}$  is taken from [Millero, 1995](#) using data from [Dickson, 1990](#). At reference conditions it is given by

$$\begin{aligned}
 \log_e \tilde{k}_b &= \frac{(-8966.9 - 2890.53 * \sqrt{S[\text{psu}]} - 77.942 * S[\text{psu}] + 1.728 * S[\text{psu}]^{\frac{3}{2}} - 0.0996 * S[\text{psu}]^2)}{T[K]} \\
 &+ 148.0248 + 137.1942 * \sqrt{S[\text{psu}]} + 1.62142 * S[\text{psu}] \\
 &+ (-24.4344 - 25.085 * \sqrt{S[\text{psu}]} - 0.2474 * S[\text{psu}]) * \log_e \frac{T[K]}{100} \\
 &+ 0.053105 * \sqrt{S[\text{psu}]} * T[K] .
 \end{aligned}$$

Like for the two previous constants, a pressure correction term for deviations from reference conditions is applied following [Millero, 1995](#).

$$\begin{aligned}
 \Delta_v &= 48 + 0.1622 * T[^\circ\text{C}] - 0.002608 * T[^\circ\text{C}]^2 \\
 \Delta_k &= \frac{2.84}{1000} \\
 \log_e \frac{k_b}{\tilde{k}_b} &= \left( -\Delta_v + \frac{\Delta_k}{2} p[\text{bar}] \right) \frac{p[\text{bar}]}{R_{\text{gas}} T[K]} ,
 \end{aligned}$$

## 2.2 Total alkalinity

Four different regressions from temperature and salinity to determine total alkalinity are available in the model. The choice which regression is used in the simulation is

given by the ISWtalk parameter in the file `ersem_pelagic_switches.nml`. Their strenghts and limitations are discussed in [Artioli et al., 2012](#), and [Blackford et al., 2010](#) and their respective original publications.

The first one, activated by setting ISWtalk= 1, originates from [Bellerby et al., 2005](#) for salinity > 34.65

$$\mathbb{A}_{tot} = (66.96 * S[\text{psu}] - 36.803) * 10^{-6}$$

and uses the formulation of [Borges1999] for smaller salinities

$$\mathbb{A}_{tot} = (3887. - 46.25 * S[\text{psu}]) * 10^{-6} .$$

This description was developed mainly for the North Sea and is provided for legacy configurations.

For ISWtalk= 2 the following regression of [Millero1998] is used:

$$\mathbb{A}_{tot} = (520.1 + 51.24 * S[\text{psu}]) * 10^{-6} .$$

This is the recommended formulation for the North Atlantic and adjacent shelf seas.

The third option (ISWtalk= 3) taken from [Millero1998] includes temperature dependency for waters warmer than 20°C

$$\mathbb{A}_{tot} = (S[\text{psu}]/35. * (2291. - 2.69 * (T[^\circ\text{C}] - 20) - 0.046 * (T[^\circ\text{C}] - 20)^2)) * 10^{-6} .$$

and uses the regression for salinity dependence identical to the option ISWtalk= 2 for lower temperatures.

As a fourth, alternative option (ISWtalk= 3) a combination of regressions from [Lee2006] is available , using one formulation for Atlantic waters colder than 20°C

$$\begin{aligned} \mathbb{A}_{tot} = & (2305. + 53.97 * (S[\text{psu}] - 35) + 2.74 * (S[\text{psu}] - 35)^2 \\ & - 1.16 * (T[^\circ\text{C}] - 20) - 0.04 * (T[^\circ\text{C}] - 20.)^2) * 10^{-6} \end{aligned}$$

and one for subtropical, warmer waters:

$$\begin{aligned} \mathbb{A}_{tot} = & (2305. + 58.66 * (S[\text{psu}] - 35) + 2.32 * (S[\text{psu}] - 35)^2 \\ & - 1.41 * (T[^\circ\text{C}] - 20) - 0.04 * (T[^\circ\text{C}] - 20.)^2) * 10^{-6} . \end{aligned}$$

## 2.3 Saturation states

The saturation state constants of aragonite and calcite at reference conditions are computed following [Zeebe, 2001](#) as

$$\begin{aligned}\log_{10} \tilde{k}_{arag} &= -171.945 - 0.077993 * T[K] + \frac{2903.293}{T[K]} + 71.595 * \log_{10} T[K] \\ &+ \left( -0.068393 + 0.0017276 * T[K] + \frac{88.135}{T[K]} \right) * \sqrt{S[\text{psu}]} \\ &- 0.10018 * S[\text{psu}] + 0.0059415 * S[\text{psu}]^{\frac{3}{2}} \\ \log_{10} \tilde{k}_{calc} &= -171.9065 - 0.077993 * T[K] + \frac{2839.319}{T[K]} + 71.595 * \log_{10} T[K] \\ &+ \left( -0.77712 + 0.0028426 * T[K] + \frac{178.34}{T[K]} \right) * \sqrt{S[\text{psu}]} \\ &- 0.07711 * S[\text{psu}] + 0.0041249 * S[\text{psu}]^{\frac{3}{2}}\end{aligned}$$

Also these relationships are corrected for pressure dependency, which for aragonite is given by

$$\begin{aligned}\Delta_v &= -46 + 0.5304 * T[^\circ\text{C}] \\ \Delta_k &= -11.76 * 10^{-3} + 0.3692 * 10^{-3} * T[^\circ\text{C}] \\ \log_e \frac{k_2}{\tilde{k}_2} &= (-\Delta_v + \frac{\Delta_k}{2} p[\text{bar}]) \frac{p[\text{bar}]}{R_{gas} T[K]},\end{aligned}$$

while for calcite it is given by

$$\begin{aligned}\Delta_v &= -48.76 + 0.5304 * T[^\circ\text{C}] \\ \Delta_k &= -11.76 * 10^{-3} + 0.3692 * 10^{-3} * T[^\circ\text{C}] \\ \log_e \frac{k_2}{\tilde{k}_2} &= (-\Delta_v + \frac{\Delta_k}{2} p[\text{bar}]) \frac{p[\text{bar}]}{R_{gas} T[K]},\end{aligned}$$

The oxygen saturation concentration can be computed using two different empirical relationships. The first, activated by ISW02X= 1 is inherited from older versions of the model:

$$s_0[\text{ml l}^{-1}] = 31.25 * \frac{475. - 2.65 * S[\text{psu}]}{33.5 + T[^\circ\text{C}]}.$$

For the second option ISW02X= 2 it is taken from [Weiss, 1974](#):

$$\begin{aligned}\log_e s_0[\text{ml l}^{-1}] &= -173.4292 + \frac{249.6339}{\frac{T[K]}{100}} + 143.3483 * \log_e \frac{T[K]}{100} - 21.8492 * \frac{T[K]}{100} \\ &+ S[\text{psu}] * \left( -0.033096 + 0.014259 * \frac{T[K]}{100} + -0.0017 * \left( \frac{T[K]}{100} \right)^2 \right).\end{aligned}$$

This needs to be converted to the model units:

$$s_0[\text{mmol m}^{-3}] = s_0[\text{ml l}^{-1}] * \frac{p[\text{Pa}]}{R_{gas} * 298.15}$$

## 2.4 Air-sea flux

The gas transfer coefficients regulating the gas flux between sea and atmosphere are taken from *Weiss, 1970* and *Nightingale et al., 2000*

In the case of oxygen two distinct relations are used in relation to the wind speed at sea surface. For wind speeds exceeding  $11 \text{ m d}^{-1}$  the coefficient is given by

$$k_{airO}[\text{m d}^{-1}] = \frac{24}{100} (0.02383 * v_{wind}^3) * \frac{\sqrt{1953.4 - 128 * T[^\circ\text{C}] + 3.9918 * T[^\circ\text{C}]^2 - 0.050091 * T[^\circ\text{C}] * *3}}{660}$$

and for lower winds by

$$k_{airO}[\text{m d}^{-1}] = \frac{24}{100} (0.31 * v_{wind}^3) * \frac{\sqrt{1953.4 - 128 * T[^\circ\text{C}] + 3.9918 * T[^\circ\text{C}]^2 - 0.050091 * T[^\circ\text{C}] * *3}}{660} .$$

For carbon dioxide it is given by

$$k_{airC}[\text{m d}^{-1}] = \frac{24}{100} k_0 (0.222 * v_{wind}[\text{m d}^{-1}]^2 + 0.333 * v_{wind}[\text{m d}^{-1}]) * \frac{\sqrt{2073.1 - 125.62 * T[^\circ\text{C}] + 3.6276 * T[^\circ\text{C}]^2 - 0.043219 * T[^\circ\text{C}]^3}}{600} .$$

## 2.5 Resuspension

The erosion parameter  $r_{er}[\text{mg m}^{-2} \text{ d}^{-1}]$  in the resuspension formulation of the model is computed as

$$r_{er}[\text{mg m}^{-2} \text{ d}^{-1}] = 100 * \tau_{crit}[\text{Pa}] * 1000 * 86400$$

where  $\tau_{crit} = 0.0004 \text{ Pa}$  is the critical stress at sea-bed. The parameter regulating the organic proportion of the resuspended material  $\rho_Q^{sed}[\text{mg m}^{-3}]$  is determined from an empirical relationship with the water depth  $z$ :

$$\rho_Q^{sed}[\text{mg m}^{-3}] = 10 * (-1069 * \log_e(z[\text{m}]/1\text{m}) + 10900)$$

## 3 References

Artioli, Y., Blackford, J.C., Butenschön, M., Holt, J.T., Wakelin, S.L., Thomas, H., Borges, A.V., Allen, J.I., 2012. The carbonate system in the North Sea: Sensitivity and model validation. *Journal of Marine Systems* 102-104, 1 – 13. doi:10.1016/j.jmarsys.2012.04.006

*Blackford, J., Artioli, Y., Kelly-Gerreyn, B., Martin, A., Tyrrell, T., Somavilla, R., 2010. Sub-model acidification-sensitive calcification rate, including user guide (Project Report No. D2.2). EC FP7 MEECE - 212085.*

*Borges, A.V., Frankignoulle, M., 1999. Daily and seasonal variations of the partial pressure of CO<sub>2</sub> in surface seawater along Belgian and southern Dutch coastal areas. Journal of Marine Systems 19, 251–266. doi:10.1016/S0924-7963(98)00093-1*

*Bellerby, R.G.J., Olsen, A., Furevik, T., Anderson, L.G., 2005. Response of the Surface Ocean CO<sub>2</sub> System in the Nordic Seas and Northern North Atlantic to Climate Change, in: Helgeange, Dokken, T., Furevik, T., Gerdes, R., Berger, W. (Eds.), The Nordic Seas: An Integrated Perspective. American Geophysical Union, pp. 189–197.*

*Dickson, A.G., 1990. Thermodynamics of the dissociation of boric acid in synthetic seawater from 273.15 to 318.15 K. Deep Sea Research Part A. Oceanographic Research Papers 37, 755–766. doi:10.1016/0198-0149(90)90004-F*

*Lee, K., Tong, L.T., Millero, F.J., Sabine, C.L., Dickson, A.G., Goyet, C., Park, G.-H., Wanninkhof, R., Feely, R.A., Key, R.M., 2006. Global relationships of total alkalinity with salinity and temperature in surface waters of the world's oceans. Geophys. Res. Lett. 33, L19605. doi:10.1029/2006GL027207*

*Mehrbach, C., Culberson, C.H., Hawley, J.E., Pytkowicz, R.M., 1973. Measurement of the Apparent Dissociation Constants of Carbonic Acid in Seawater at Atmospheric Pressure. Limnol. Oceanogr. 18, 897–907. doi:10.4319/lo.1973.18.6.0897*

*Millero, F.J., 1995. Thermodynamics of the carbon dioxide system in the oceans. Geochimica et Cosmochimica Acta 59, 661–677. doi:10.1016/0016-7037(94)00354-O*

*Millero, F.J., Lee, K., Roche, M., 1998. Distribution of alkalinity in the surface waters of the major oceans. Marine Chemistry 60, 111–130. doi:10.1016/S0304-4203(97)00084-4*

*Nightingale, P.D., Malin, G., Law, C.S., Watson, A.J., Liss, P.S., Liddicoat, M.I., Boutin, J., Upstill-Goddard, R.C., 2000. In situ evaluation of air-sea gas exchange parameterizations using novel conservative and volatile tracers. Global Biogeochemical Cycles 14, 373–387. doi:10.1029/1999GB900091*

*Weiss, R.F., 1970. The solubility of nitrogen, oxygen and argon in water and seawater. Deep Sea Research and Oceanographic Abstracts 17, 721–735. doi:10.1016/0011-7471(70)90037-9*

*Weiss, R.F., 1974. Carbon dioxide in water and seawater: the solubility of a non-ideal gas. Marine Chemistry 2, 203–215. doi:10.1016/0304-4203(74)90015-2*

*Zeebe, R.W., Wolf-Gladrow, D., 2001. CO<sub>2</sub> in Seawater: Equilibrium, Kinetics,*

Isotopes, Elsevier Oceanography Series. Elsevier.
